# Supplementary material
Source: publisher site journal article supplement (https://www.dovepress.com/article/314509)
Supplement: Supplementary file 1 [file get_supplementary_file.php]

**Appendix**

First part: addressing the survey (cover letter, objectives and domains)

Second part: addressing the calculated mean

**Appendix (First part)**

**Cover letter**

**E-Learning for Undergraduate Medical Students: A Web-Based Survey**

To modernize teaching and learning via digital technology, we need to maximize the benefits offered by e-technologies. It is critical to understand and incorporate the views of potential participants in particular, undergraduate medical students.

**The goal of this survey is:**

1. To explore changes in Knowledge, Attitude and Challenges of medical students on e-learning

**Research questions:**

1. Does the use of e-learning have any influence on student’s academic performance?

**Secondary objectives:**

1. To determine how the use of e-learning has influenced the academic performance of medical students

**Secondary outcomes:**

1. Differences of scores (course, summative exam and GPA scores) in the 1st and 2nd semester before and after implementation of e-learning.

This survey is intended for (UQU) medical students’ males and females in the past academic year (2019-2020).

You are invited to participate in this survey (10 minutes to complete).

You are under no obligation to participate. The information collected will not be shared or linked to any identifying information you provided and will be kept anonymous.

Thank you for supporting this project.

Dr Emad Tashkandi

1. **This domain will collect demographics:**

Do you agree to participate in this study?

Yes

No

**1.** Your age in years?

………………………………

**2.** Your Gender?

Male

Female

**3.** Your level in the past academic year, Sep 2019 - June 2020?

Year 2

Year 3

Year 4

Year 5

Year 6

**2.This domain will collect information on knowledge, attitude and challenges of e-learning:**

**First part:** *assess the knowledge of e-learning modalities*

**4.**Did you know that these tools could be used for e-learning?

| **Tools** | **Yes** | **Unsure** | **No** |
| --- | --- | --- | --- |
| Discussion boards (blackboards): allow participants to communicate and learn |  |  |  |
| Problem based learning (PBL): can run totally in online environment |  |  |  |
| Simulations (game-informed learning or virtual patients): Online simulations and virtual patients can be delivered online |  |  |  |
| Online classes: allow students to attend classes with audio-video or combined together |  |  |  |
| e-assessment: allow students to assess knowledge (formative and summative) via computer-based testing |  |  |  |
| e-Portfolios: allow students to build online their work, experiences and reflections |  |  |  |
| Mobile learning: allow students to use mobile electronic devices to access online contents |  |  |  |
| e-resources support: allow students to access materials such as Syllabus or Course Outlines |  |  |  |
| Links: allow students to access other resources, case studies, videos, audios, course notes and presentations |  |  |  |

**5.**What kind of benefits have you gained from these tools?

| **Tools** | **No knowledge** | **Some knowledge** | **Fair knowledge** | **Very good knowledge** | **Excellent knowledge** |
| --- | --- | --- | --- | --- | --- |
| Discussion boards (blackboards) |  |  |  |  |  |
| e-problem based learning (e-PBL) |  |  |  |  |  |
| Simulations (game-informed learning or virtual patients) |  |  |  |  |  |
| Online classes |  |  |  |  |  |
| e-assessment |  |  |  |  |  |
| e-Portfolios |  |  |  |  |  |
| Mobile learning |  |  |  |  |  |
| e-resources support |  |  |  |  |  |
| Links |  |  |  |  |  |

**Second part*:*** *assess the attitude toward e-learning*

**6.** Regarding attitude, please answer all of the following:

|  | **Not at all**  **(1)** | **Not Really**  **(2)** | **Undecided**  **(3)** | **Somewhat**  **(4)** | **Very Much**  **(5)** |
| --- | --- | --- | --- | --- | --- |
| I have adequate knowledge about e-learning |  |  |  |  |  |
| I have proper training with e-learning |  |  |  |  |  |
| I feel I have positive feelings about e-learning |  |  |  |  |  |
| I am comfortable in engaging in any e-learning programs |  |  |  |  |  |
| I feel overwhelmed with entire process of e-learning |  |  |  |  |  |
| I have no patience during navigating minor technical issues |  |  |  |  |  |

**Third part:** *assess the challenges of e- learning*

**7.** What challenges have you experienced with e-learning? (can select more than one)

User skills

User knowledge

Lack of technical support

Lack of devices and programs

Lack of desktop computers

Poor Internet speed

Lack of Multimedia

Lack of security

Lack of privacy

Lack of access with username and password

Psychological issue

Legal and ethical issues

Confidentiality

Validity and applicability

Alignment with current curriculum

Lack of guidelines

Poor quality

Lack of training

Lack of engagement

Lack of social interactions

Lack of feedback

Lack of clinical experience & physical examination skills

Lack of communication in the institution

Concerns about professional development

Cost

Other: please specify

**This domain will collect information on academic performance:**

**8**. To the best of your knowledge in the past academic year in Sep 2019 - June 2020, what was your test score (summative exam)? By the end of 1st semester, your score was ______out of 100?

**9.** To the best of your knowledge in the past academic year in Sep 2019 - June 2020, what was your test score (summative exam)?

By the end of 2nd semester, your score was ______out of 100?

**10.** How many classes (including hospital and skill labs) did you NOT attend? (please write in numbers)

How many classes (including hospital and skill labs) did you NOT attend, (please write in numbers) in first semester?

--------------------

**11.** How many classes (including hospital and skill labs) did you NOT attend? (please write in numbers)

How many classes (including hospital and skill labs) did you NOT attend, (please write in numbers) in Second semester?

---------------------

**Final comments?**

………………..

**Thank you**

**End of survey**

**Appendix (Second part)**

**Calculated weighted average for ordinal scales**

**Likert scale**

| No | From 1 to 1.66 |
| --- | --- |
| Unsure | From 1.67 to 2.33 |
| Yes | From 2.34 to 3 |

**Likert scale**

| Not at all | No knowledge | 1-1.79 |
| --- | --- | --- |
| Not Really | Some knowledge | 1.80-2.59 |
| Undecided | Fair knowledge | 2.60-3.39 |
| Somewhat | Very good knowledge | 3.40-4.19 |
| Very Much | Excellent knowledge | 4.20-5 |
